# Supplementary material
Source: Springer Nature journal article supplement (https://www.springermedizin.de/resource/supplementary/12914_2011_198_MOESM2_ESM.pdf/9537094)

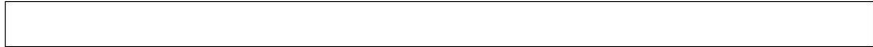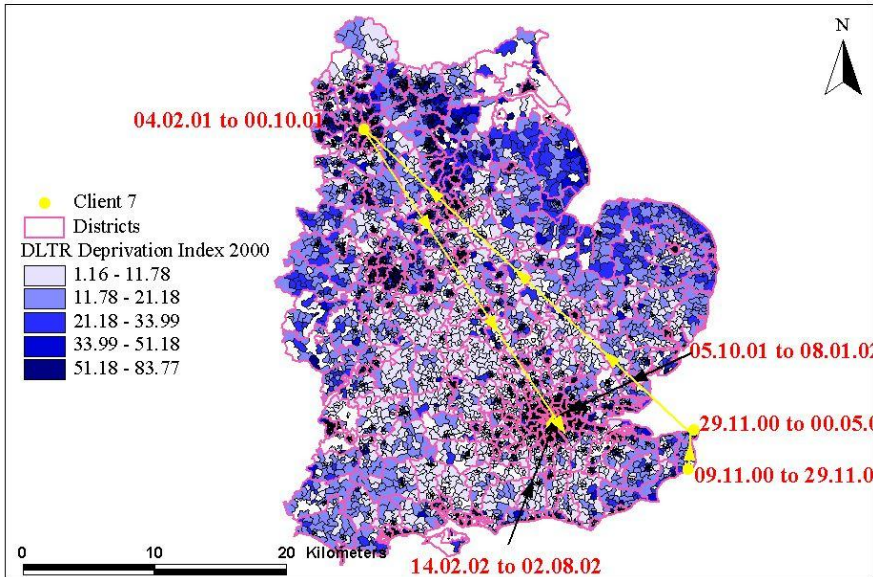

Supplement: MOESM2 [file 9537094]
